# Supplementary material for: RETRACTED: Post-acute (long) COVID-19 quality of life: validation of the German version of (PAC19QoL) instrument
Source: Frontiers journal article supplement (doi:10.3389/fpubh.2023.1163360), 2023-06-30
Supplement: Table_1.DOCX [file Table_1.DOCX]

in me möchte das Forschungsteam der Jesseniove lekarskéj fakulty UK in Martine Sie bitten, einen Fragebogen auszufüllen, dessen Ziel es ist, die Lebensqualität und den Gesundheitszustand nach Überwindung der Krankheit COVID-19 herauszufinden.

Das Ausfüllen des Fragebogens ist einfach, nimmt aber maximal 10 Minuten Ihrer Zeit in Anspruch. Bitte seien Sie bei Ihren Stornierungen ehrlich. Alle von Ihnen bereitgestellten Informationen werden ausschließlich für wissenschaftliche Zwecke verwendet. Die Studie wurde von der UNM-Ethikkommission genehmigt (EC UNM no. 71/2022).

Mit dem Ausfüllen des Fragebogens bestätigen Sie, dass Sie der Teilnahme an dieser Studie bereits zustimmen, Ihre Teilnahme jedoch freiwillig ist.

Vielen Dank im Voraus für Ihre Kooperationsbereitschaft

Wählen Sie die Antwort aus, die Ihre Gefühle am besten beschreibt

|  | **Fragen** | **1** | **2** | **3** | **4** | **5** |
| --- | --- | --- | --- | --- | --- | --- |
| 1 | Ich habe gelegentlich schlechte Laune (einschließlich Bezahlen) | ani raz | zriedka | raz za čas | často | váz |
| 2 | Ich erlebe ab und zu Wutgefühle | ani raz | zriedka | raz za čas | často | vždy |
| 3 | Ich fühle mich aufgrund der Auswirkungen von COVID | ani raz | zriedka | raz za čas | často | vždy |
| 4 | Meine Motivation, mich an meinen regelmäßigen Aktivitäten zu beteiligen, | veľmi slabá | slabá | primeraná | dobrá | vynikajúca |
| 5 | Ich mache mir Sorgen um meine zukünftige Gesundheit im Allgemeinen | ani raz | zriedka | raz za čas | často | vždy |
| 6 | Ich bin besonders ängstlich, weil ich ab und zu wieder an COVID-19 erkranke | ani raz | zriedka | raz za čas | často | vždy |
| 7 | Cítim ážkosť o bubuduce zdravie mojich detí | ani raz | zriedka | raz za čas | často | vždy |
| 8 | Ich mache mir Sorgen um meine zukünftige Beziehung zu meiner Familie | ani raz | zriedka | raz za čas | často | vždy |
| 9 | Ich mache mir Sorgen um meine künftige finanzielle Situation | ani raz | zriedka | raz za čas | často | vždy |
| 10 | Cítim ážkosť, schon som závislým oder eine Belastung für meine Verwandten oder andere (wenn es sich um Wohltätigkeit handelt) | ani raz | zriedka | raz za čas | často | vždy |
| 11 | Cítim ázkosť bez apálného práceo | ani raz | zriedka | raz za čas | často | vždy |
| 12 | Ich empfinde Angst, Erinnerungen an traumatische Ereignisse wiederzuerleben, | ani raz | zriedka | raz za čas | často | vždy |
| 13 | Meine Fähigkeit, Informationen zu verarbeiten und meine Gedanken zu ordnen, | veľmi slabá | slabá | primeraná | dobrá | vynikajúca |
| 14 | Meine Fähigkeit, mich auf die Hausarbeit zu konzentrieren, | veľmi slabá | slabá | primeraná | dobrá | vynikajúca |
| 15 | Meine Fähigkeit, mich in Worten auszudrücken, | veľmi slabá | slabá | primeraná | dobrá | vynikajúca |
| 16 | Psychische Belastungen machen mich sehr müde auch | ani raz | zriedka | raz za čas | často | vždy |
| 17 | Psychische Überanstrengung bereitet mir sofort Kopfschmerzen | ani raz | zriedka | raz za čas | často | vždy |
| 18 | Bei geistiger Erschöpfung wird | ani raz | zriedka | raz za čas | často | vždy |
| 19 | Phyzická námaha verursacht Schmerzen in meiner Brust | ani raz | zriedka | raz za čas | často | vždy |
| 20 | Fyzická námaha mi často častočevičnosť | ani raz | zriedka | raz za čas | často | vždy |
| 21 | Phyzická námaha macht mich sehr | ani raz | zriedka | raz za čas | často | vždy |
| 22 | Meine Fähigkeit, tägliche Aufgaben vor Erschöpfung zu erledigen, | veľmi slabá | slabá | primeraná | dobrá | vynikajúca |
| 23 | Meine Fähigkeit, vor Erschöpfung an gesellschaftlichen Veranstaltungen teilzunehmen, | veľmi slabá | slabá | primeraná | dobrá | vynikajúca |
| 24 | Meine Fähigkeit, für meinen Ehepartner oder meine Kinder zu sorgen, | veľmi slabá | slabá | primeraná | dobrá | vynikajúca |
| 25 | Meine Fähigkeit, mich zu waschen und anzuziehen, | veľmi slabá | slabá | primeraná | dobrá | vynikajúca |
| 26 | Ich habe von Zeit zu Zeit Schmerzen in meinen Gelenken | ani raz | zriedka | raz za čas | často | vždy |
| 27 | Meine Fahrtüchtigkeit ist derzeit sehr schlecht | veľmi slabá | slabá | primeraná | dobrá | vynikajúca |
| 28 | Meine Fähigkeit, öffentliche Verkehrsmittel vor dem langfristigen COVID | veľmi slabá | slabá | primeraná | dobrá | vynikajúca |
| 29 | Cítim sa ospalý/ospalá tagsüber | ani raz | zriedka | raz za čas | často | vždy |
| 30 | Meine Fähigkeit, das Essen zu schmecken, ist (daher kann ich es nicht schmecken) | veľmi slabá | slabá | primeraná | dobrá | vynikajúca |
| 31 | Meine Fähigkeit, Alkohol zu schmecken, ist (weil ich ihn nicht schmecken kann) | veľmi slabá | slabá | primeraná | dobrá | vynikajúca |
| 32 | Wenn ich unter Atemnot leide, ist meine Sprechfähigkeit sogar selten beeinträchtigt | ani raz | zriedka | raz za čas | často | vždy |
| 33 | Meine Fähigkeit, feine Aufgaben mit meinen Fingern auszuführen (z. B. Textnachrichten an das Handy senden), | veľmi slabá | slabá | primeraná | dobrá | vynikajúca |
| 34 | Mein Interesse an Sex ist sehr | veľmi slabý | slabý | primeraný | dobrý | vynikajúci |
| 35 | Meine physische Isolation von meinen Familienmitgliedern vor dem langfristigen COVID | žiadna | veľmi slabá | slabá | mierna | vážna |
| 36 | Meine physische Isolation von meinen Freunden vor dem langfristigen COVID | žiadna | veľmi slabá | slabá | mierna | vážna |
| 37 | Meine Beziehung zu meinem Ehepartner/Partner ist | veľmi slabý | slabý | primeraný | dobrý | vynikajúci |
| 38 | Meine Beziehung zu denen, die auf mich angewiesen sind, | veľmi slabý | slabý | primeraný | dobrý | vynikajúci |
| 39 | Meine Beziehung zu meinen Freunden und Kollegen | veľmi slabý | slabý | primeraný | dobrý | vynikajúci |
| 40 | Moje emočné vypätie ma vyzherpeva | ani raz | zriedka | raz za čas | často | vždy |
| 41 | Meine Fähigkeit, meinen üblichen Hobbys oder Freizeitaktivitäten nachzugehen, | veľmi slabá | slabá | primeraná | dobrá | vynikajúca |
| 42 | Mein práceschopnosť ist | veľmi slabá | slabá | primeraná | dobrá | vynikajúca |
| 43 | Die Auswirkung von Krankheit oder Arbeitslosigkeit auf meine Karriere ist | žiadny | veľmi slabý | slabý | mierny | vážny |
| 44 | Einkommensverlust aufgrund meiner práceneschopnosť ist | žiadna | veľmi slabá | slabá | mierna | vážna |
